# Supplementary material for: Impact of Senolytic Treatment on Gene Expression in Aged Lung
Source: MDPI journal article supplement (doi:10.3390/ijms24087628), 2023-04-21
Supplement: s1 [file s1]

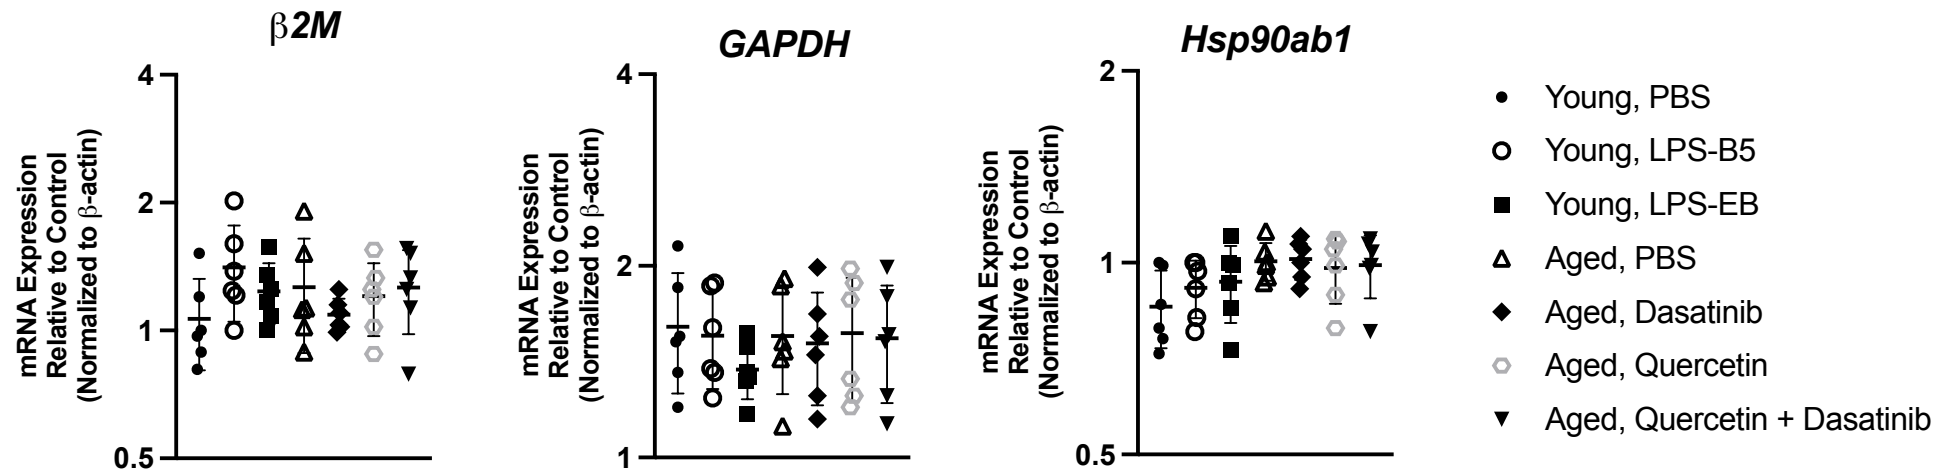

Supplemental Figure S1: Comparison of mRNA expression in lung isolated from control and treated young and aged mice.
